# Supplementary material for: Susceptibility of Domestic Goat (Capra aegagrus hircus) to Experimental Infection with Severe Acute Respiratory Syndrome Coronavirus 2 (SARS-CoV-2) B.1.351/Beta Variant
Source: MDPI journal article supplement (doi:10.3390/v14092002), 2022-09-09
Supplement: s1 [file s1]

| Goat | DPI | Tissue     | RT-qPCR, genomic RNA (Ct <30) | Virus isolation (log <sub>10</sub> TCID <sub>50</sub> /mL) |
|------|-----|------------|-------------------------------|------------------------------------------------------------|
| 1    | 2   | Tonsil     | 23.73                         | 3.1                                                        |
| 2    | 2   | NT caudal  | 28.66                         | <1.8                                                       |
| 2    | 2   | NT cranial | 25.32                         | 1.9                                                        |
| 4    | 4   | Tonsil     | 26.64                         | <1.8                                                       |
| 6    | 4   | Tonsil     | 29.22                         | <1.8                                                       |
| 8    | 7   | Tonsil     | 25.71                         | <1.8                                                       |
| 9    | 7   | Tonsil     | 29.55                         | <1.8                                                       |
| 10   | 10  | Tonsil     | 29.42                         | <1.8                                                       |
| 11   | 2   | Nasal swab | 26.96                         | <1.8                                                       |

Supplementary Table S1. Results obtained by viral titration from those samples with a Ct < 30 by genomic RT-qPCR.
